# Supplementary material for: Single-cell analysis reveals IGF-1 potentiation of inhibition of the TGF-β/Smad pathway of fibrosis in human keratocytes in vitro
Source: PubMed Central journal article supplement (PMC5043377; doi:10.1038/srep34373), 2016-09-30
Supplement: srep34373-s1.pdf [file srep34373-s1.pdf]

**Single-cell analysis reveals IGF-1 potentiation of inhibition of the TGF- $\beta$ / Smad pathway of fibrosis in human keratocytes *in vitro***

Tomislav Sarenac, Martin Trapecar\*, Lidija Gradisnik, Marjan Slak Rupnik, Dusica Pahor

\* [martin.trapecar@gladstone.ucsf.edu](mailto:martin.trapecar@gladstone.ucsf.edu)

## SUPPLEMENTARY FIGURES

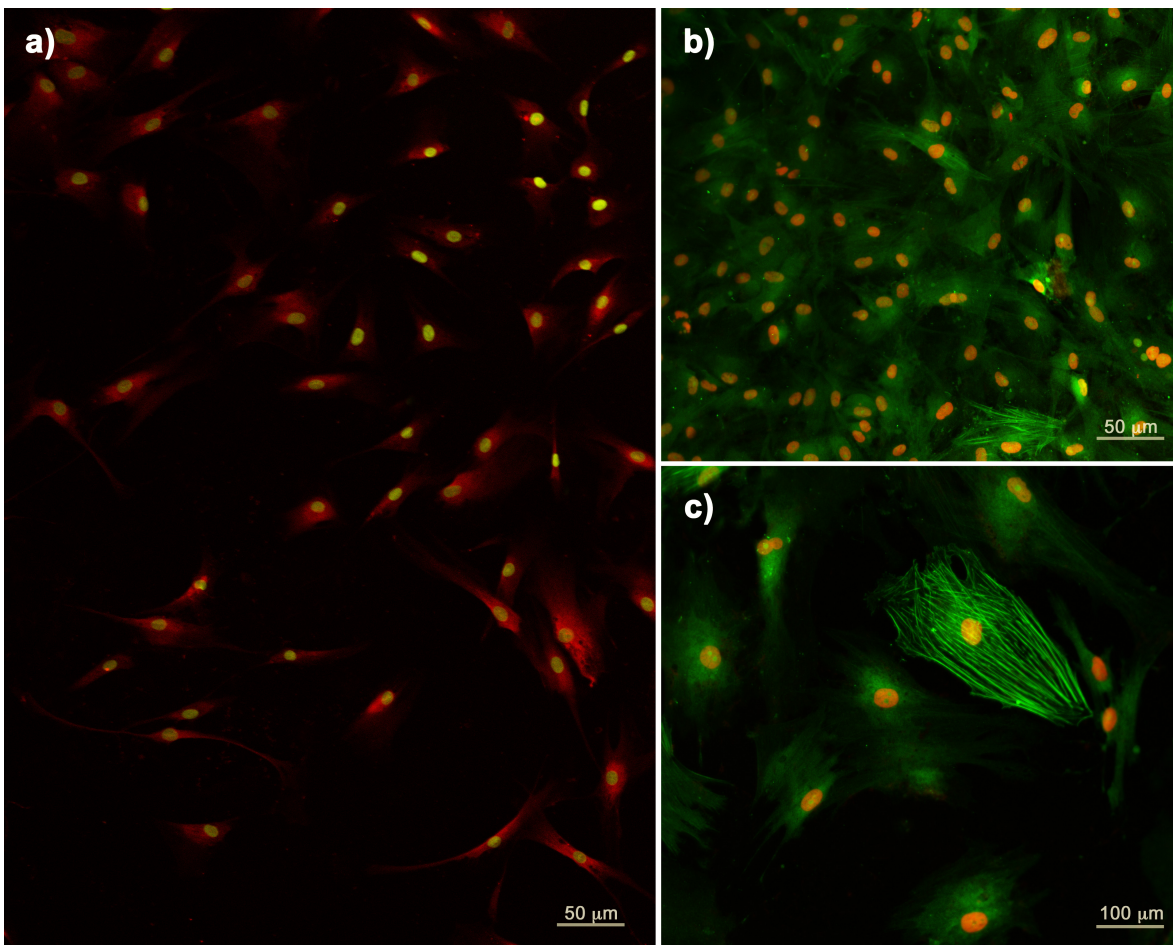

**Supplementary Figure S1. Representative confocal microscopy images of isolated primary human corneal keratocytes in culture.**

**(a, b)** Human keratocytes were labelled for the specific proteoglycan keratocan (red, AlexaFluor<sup>®</sup> 488), and the nuclei (green, DAPI) (a) and for  $\alpha$ -SMA (green, FITC) and the nuclei (red, DAPI) (b). These keratocytes showed no  $\alpha$ -SMA fibril formation, except for some cells at the edges of the microscopy field. **(c)** A differentiated corneal myofibroblast with  $\alpha$ -SMA fibres (green, FITC; nuclei, red, DAPI) surrounded by keratocytes that show no intracellular  $\alpha$ -SMA fibril formation and are smaller in size.

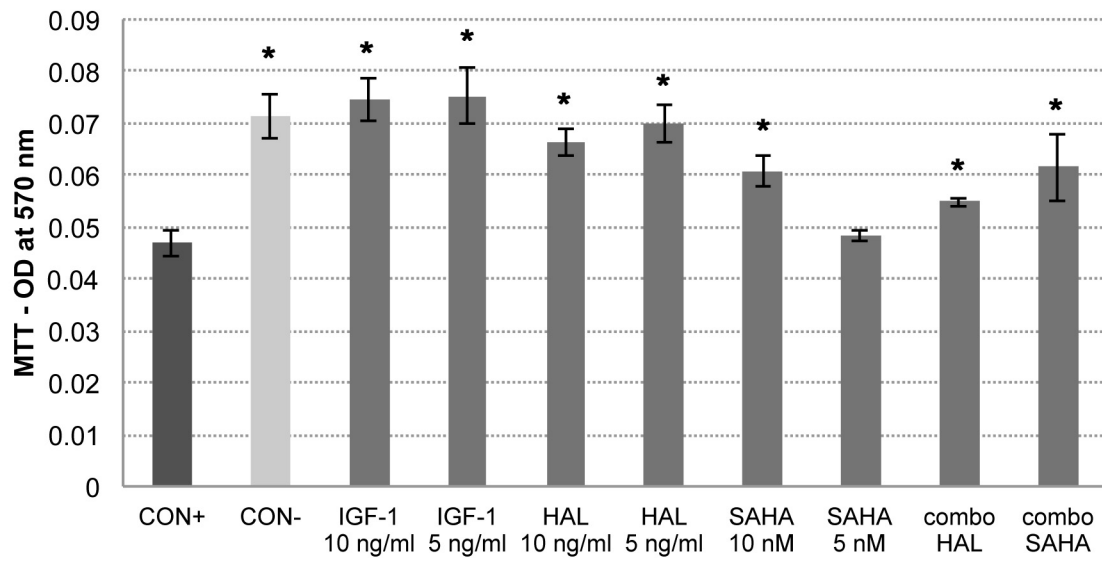

**Supplementary Figure S2. MTT cell viability assays of keratocytes following treatments.**

\*,  $p < 0.001$  compared to CON+ (ANOVA). CON+, positive control of 10 ng/ml TGF- $\beta$ 2; CON-, negative control for naïve human keratocytes. All of the following conditions also included 10 ng/ml TGF- $\beta$ 2: 10 ng/ml, 5 ng/ml IGF-1; 10 ng/ml, 5 ng/ml halofuginone (HAL); 10 ng/ml IGF-1 plus 5 ng/ml halofuginone (combo HAL); 5 nM, 10 nM SAHA; 10 ng/ml IGF-1 plus 10 nM SAHA (combo SAHA).
